# Supplementary material for: Combined small RNA and gene expression analysis revealed roles of miRNAs in maize response to rice black-streaked dwarf virus infection
Source: PubMed Central journal article supplement (PMC6131507; doi:10.1038/s41598-018-31919-z), 2018-09-10
Supplement: 41598_2018_31919_MOESM1_ESM.pdf [file 41598_2018_31919_MOESM1_ESM.pdf]

**Title:** Combined small RNA and gene expression analysis revealed roles of miRNAs in maize response to rice black-streaked dwarf virus infection

**Authors:** Aiqin Li<sup>1</sup>, Guanghui Li<sup>1</sup>, Yuhan Zhao<sup>2</sup>, Zhaodong Meng<sup>3</sup>, Meng Zhao<sup>3</sup>, Changsheng Li<sup>1</sup>, Ye Zhang<sup>1</sup>, Pengcheng Li<sup>1,2</sup>, Chang-Le Ma<sup>3</sup>, Han Xia<sup>1,2</sup>, Shuzhen Zhao<sup>1,2</sup>, Lei Hou<sup>1</sup>, Chuanzhi Zhao<sup>1,2\*</sup>, Xingjun Wang<sup>1,2\*</sup>

Aiqin Li and Guanghui Li contributed equally to this work.

**Affiliations:**

<sup>1</sup> Biotechnology Research Center, Shandong Academy of Agricultural Sciences; Shandong Provincial Key Laboratory of Crop Genetic Improvement, Ecology and Physiology, Jinan 250100, PR China.

<sup>2</sup> College of Life Sciences, Shandong Normal University, Jinan 250014, PR China

<sup>3</sup> Maize Research Institute, Shandong Academy of Agricultural Sciences, Jinan 250100, PR China.

**\* Corresponding author**

Xingjun Wang, Email: xingjunw@hotmail.com

Chuanzhi Zhao, Email: chuanzhiz@126.com

## **Supplementary Data**

Table S1. Summary of small RNA reads from four libraries

Table S2. Classification of clean reads generated from four small RNA libraries

Table S3. Detail information of known miRNAs identified

Table S4. Detail information of novel miRNAs identified

Table S5. Target genes of known miRNAs

Table S6. Target genes of novel miRNAs

Table S7. Differentially expressed miRNAs identified from small RNA libraries

Table S8. Summary of RNA-seq reads from the individual small RNA library

Table S9. Function annotation of differentially expressed genes

Table S10. Validation of RNA-seq results via qRT-PCR.

Table S11. Primers for qRT-PCR analysis.

## **Supplementary Information**

Figure S1. The morphology and molecular detection of RBSDV infected plants. a: Non-infected control plants. b: The RBSDV infected maize seedlings. c: Molecular detection of RBSDV using virus specific primers. T1-T5 were the individual plants infected by RBSDV.

Figure S2. Differentially expressed novel miRNAs identified from small RNA libraries

Figure S3. Sequencing randomness and saturation analysis for transcriptome sequencing

Figure S4. COG classification analysis of differentially expressed genes

Figure S5. GO annotation of differentially expressed genes

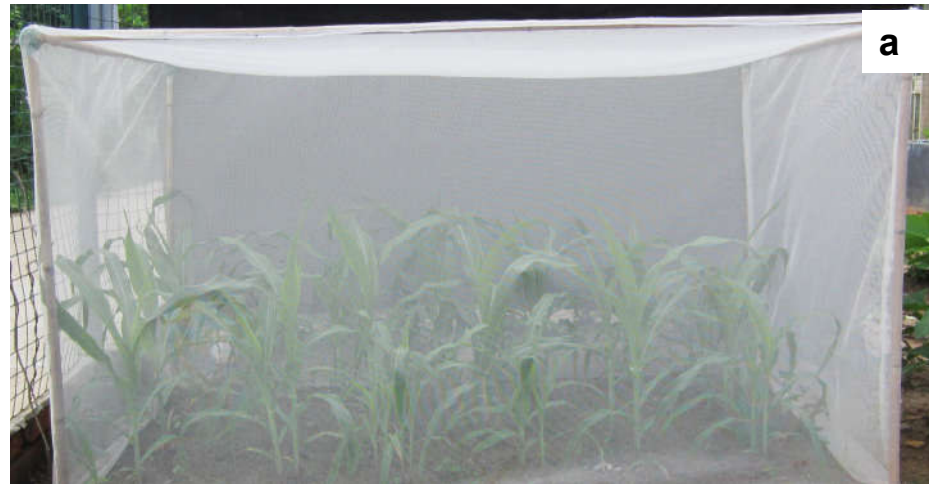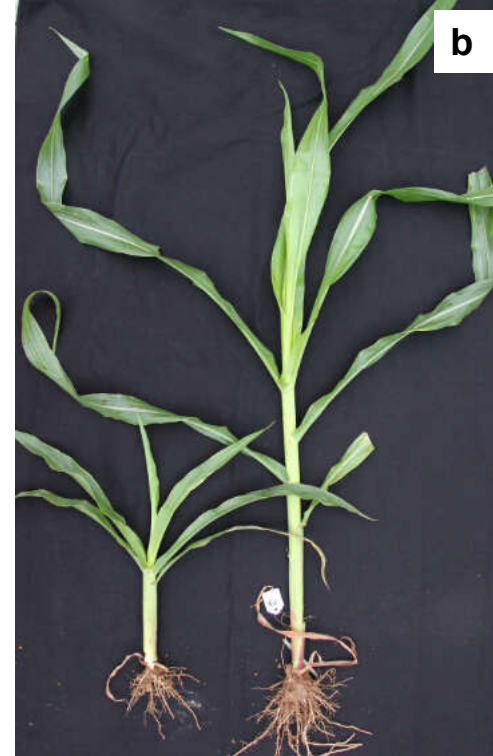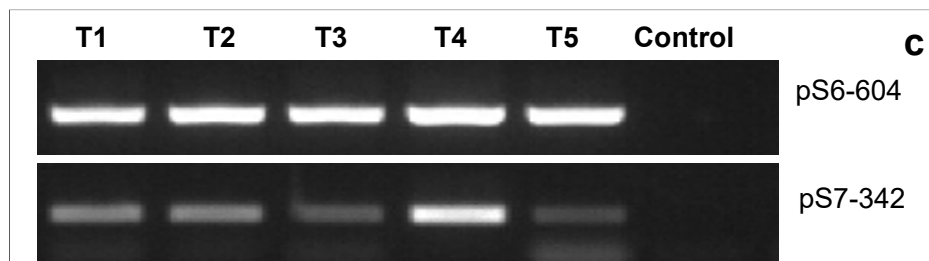

Figure S1

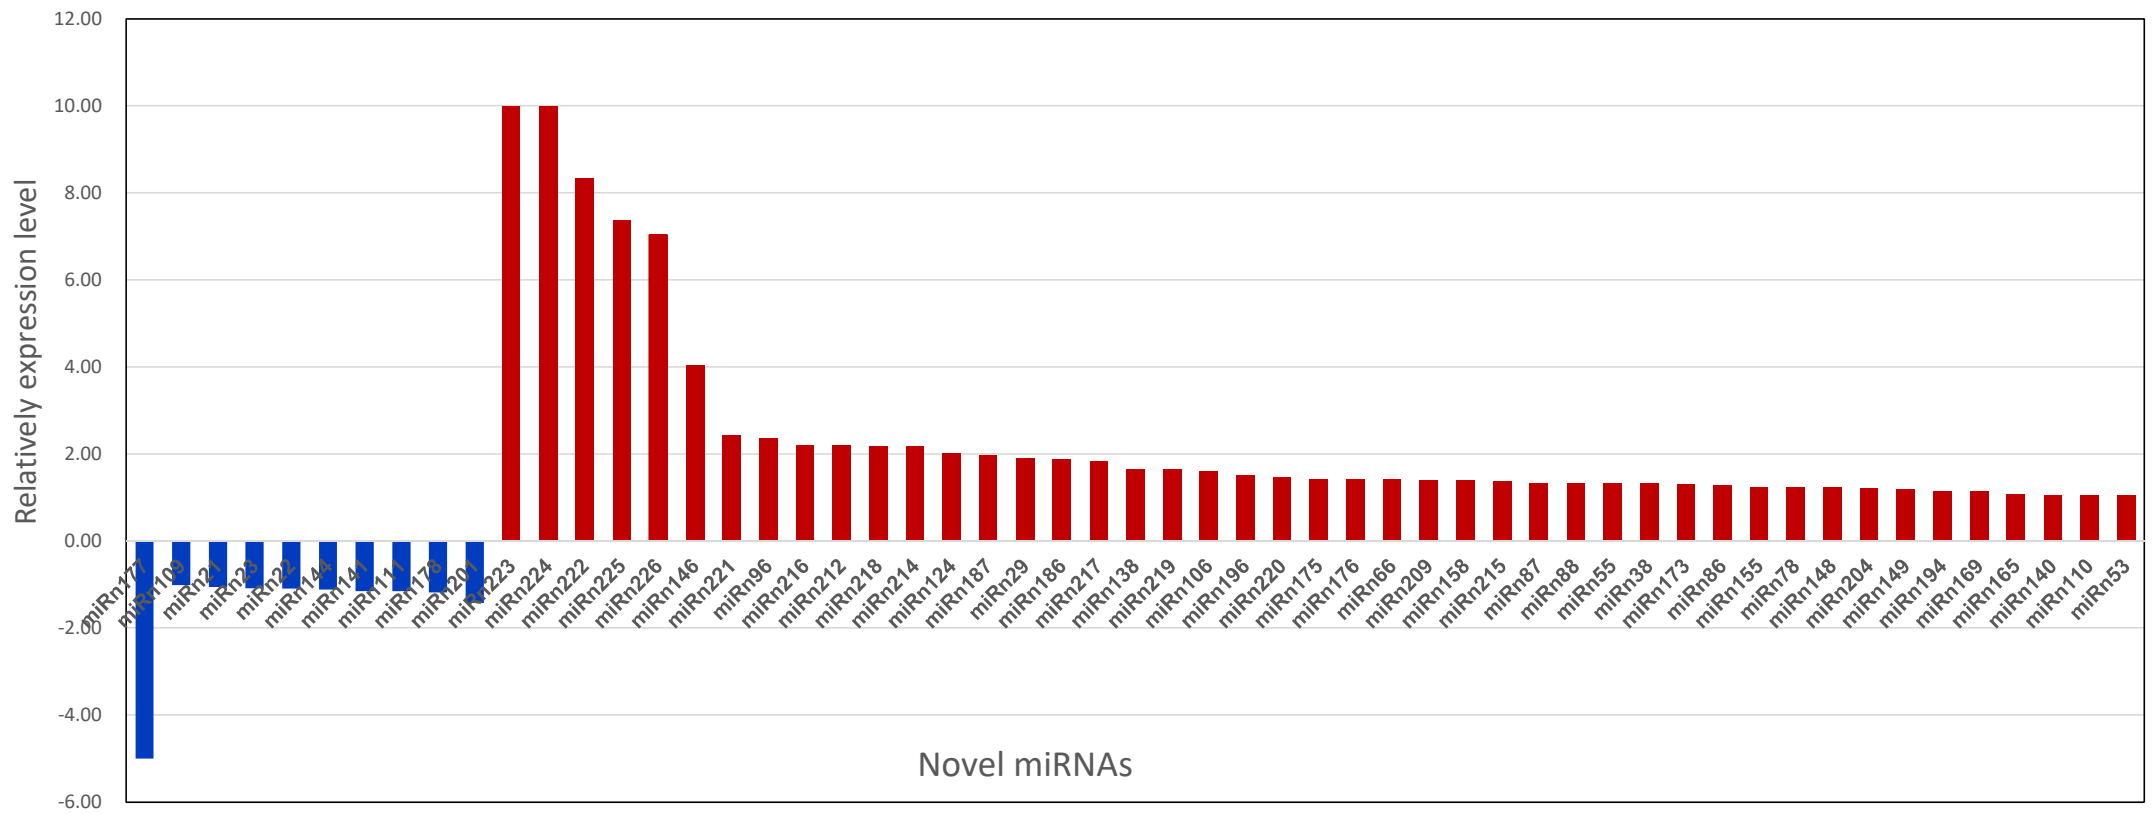

Figure S2

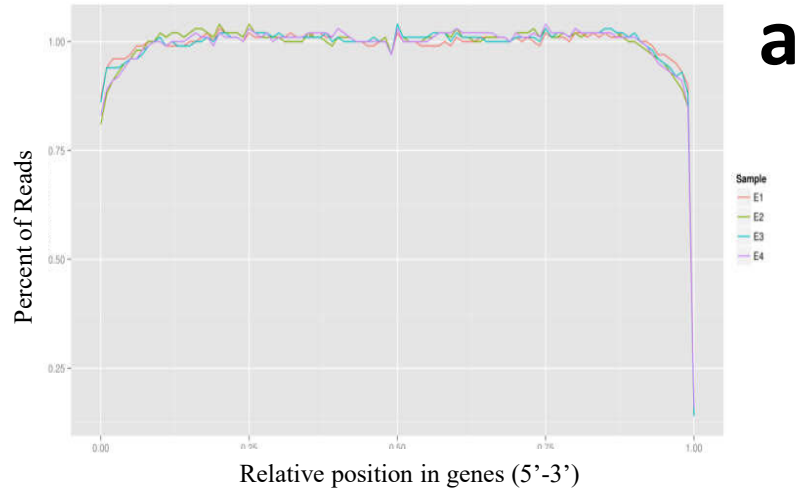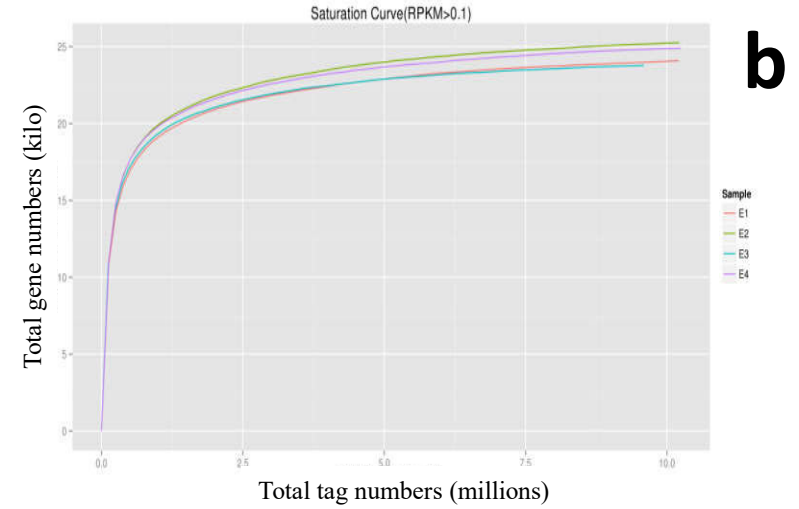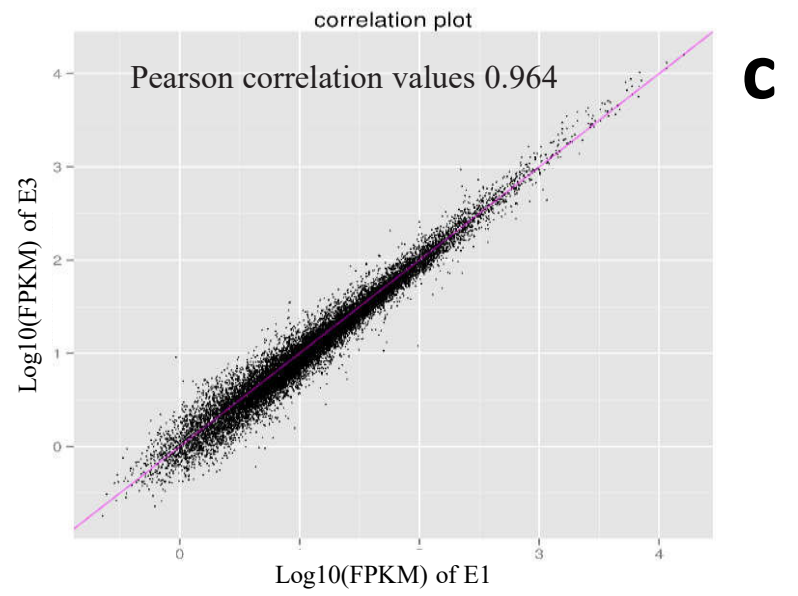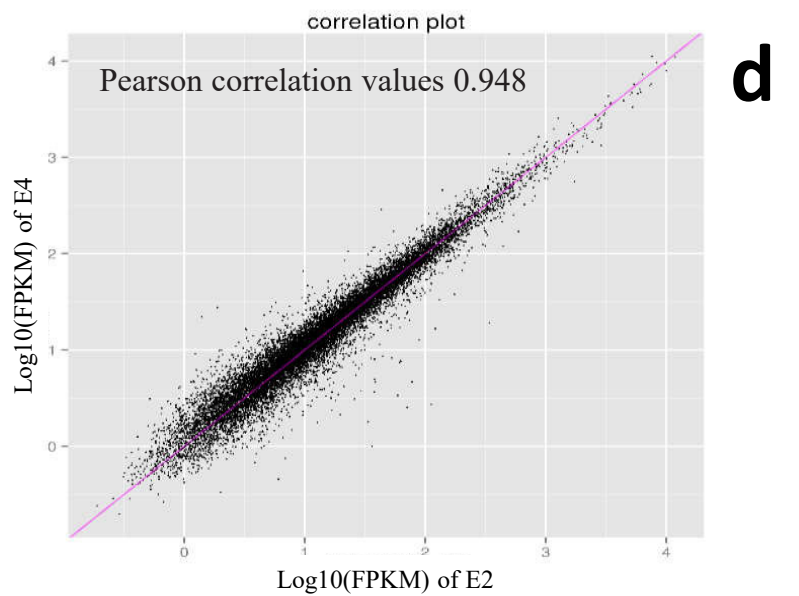

Figure S3

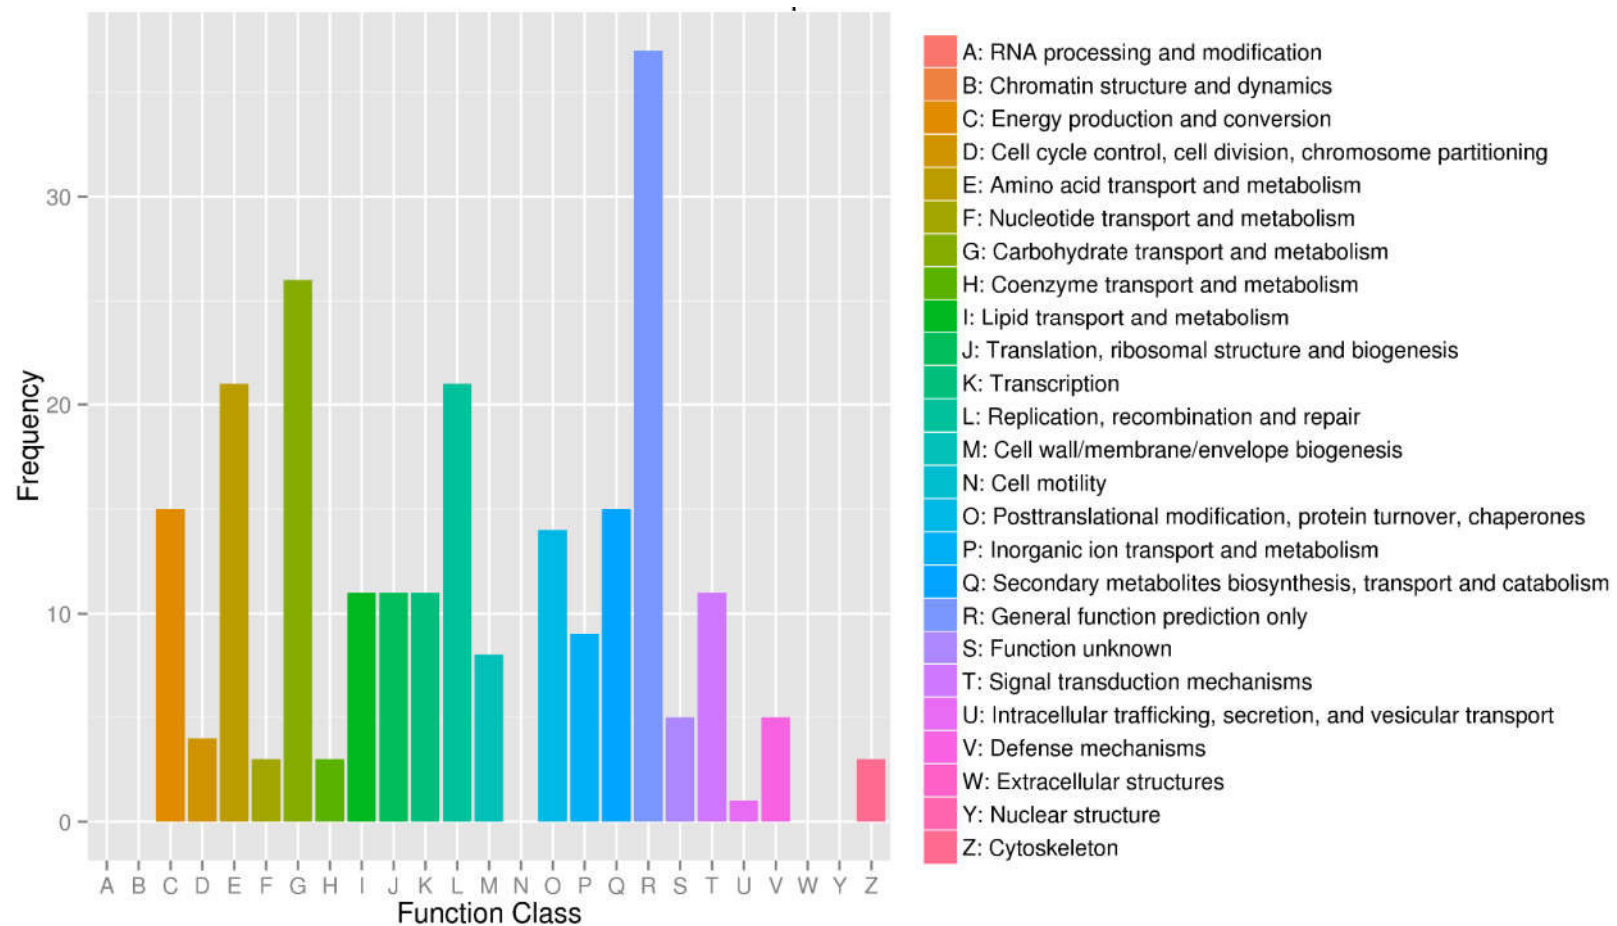

**Figure S4**

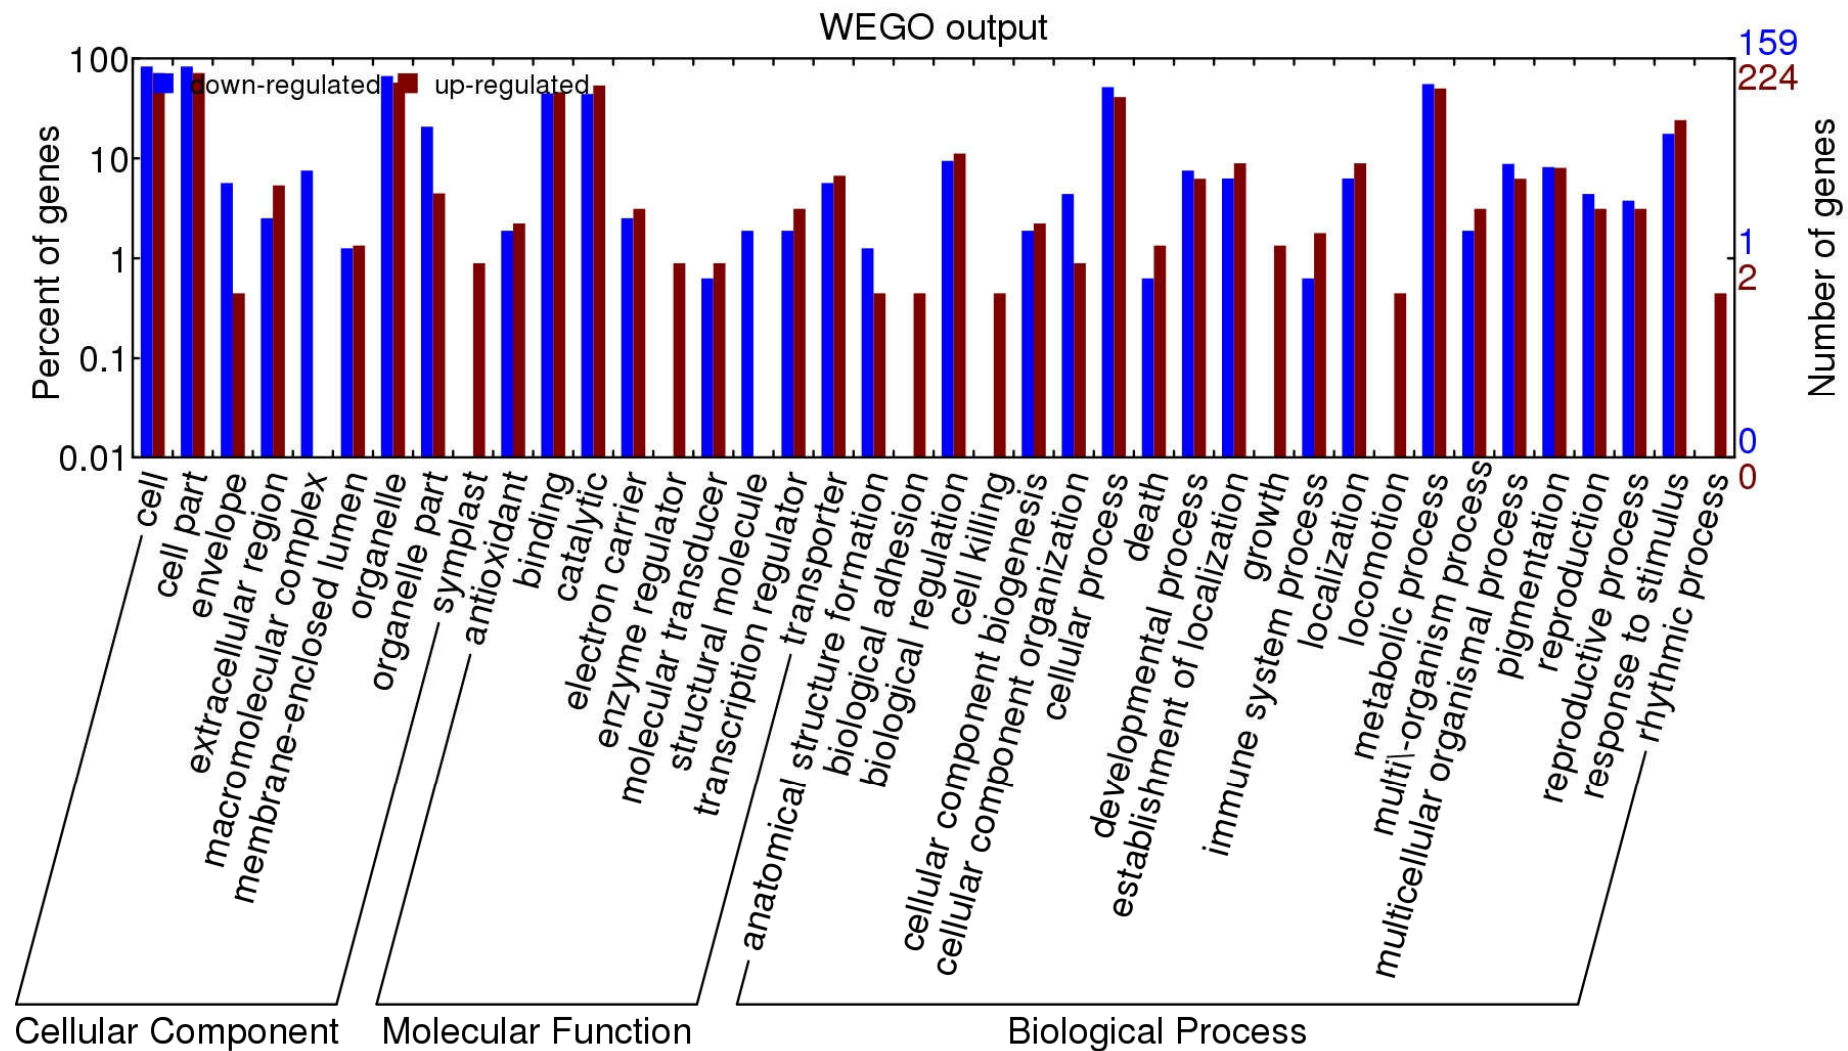

Figure S5
